## Retraction: MicroRNA-610 suppresses osteosarcoma oncogenicity via targeting TWIST1 expression

Chi Jin<sup>1,\*</sup>, Yongjian Feng<sup>2,\*</sup>, Yongjian Ni<sup>1</sup> and Zhonglin Shan<sup>1</sup>

<sup>1</sup>The Third Department of Orthopaedics, Central Hospital of Cangzhou City, Cangzhou, Hebei, China

<sup>2</sup>The Fourth Department of Orthopaedics, Central Hospital of Cangzhou City, Cangzhou, Hebei, China

\*These authors contributed equally to this work

**Published:** October 06, 2025

**Copyright:** © 2025 Jin et al. This is an open access article distributed under the terms of the [Creative Commons Attribution License](https://creativecommons.org/licenses/by/4.0/) (CC BY 4.0), which permits unrestricted use, distribution, and reproduction in any medium, provided the original author and source are credited.

**This article has been retracted:** Oncotarget's Image Forensics investigation of this paper has revealed numerous image manipulations, internal and external overlaps and duplications. In particular, the Snail western blot in Figure 3A was duplicated as Twist western blot in Figure 6E and GAPDH image from 3A is duplicated in Figure 6D. The Transwell assay image in Figure 5C is very similar to image in Figure 8I, with some changes introduced by image manipulations. The same Figures 5C, 8I and 8J contain images from Figure 3B of an earlier published paper, which has since been retracted [1]. Images in Figure 5, panels C and D, also were found in Figure 3B of retracted paper [2] and Figure 5C also duplicates an image from Figure 5C of [3], which has also been retracted. The western blot GAPDH image from this paper [3] was also reproduced in Figures 3A and 6D and the same image was found in 2015 papers [4, 5]. The Snail blot from Figure 3A which is identical to the Twist blot from Figure 6E also present in Figure 4J as PIK3CD bands in [6], SP1 bands in [7] and ABCB1 blot in [8]. Therefore, the Editorial decision was made to retract this paper. Oncotarget has attempted to contact the authors several times but has received no replies. All authors either did not respond directly or could not be reached.

Original article: Oncotarget. 2017; 8:56174–56184. <https://doi.org/10.18632/oncotarget.17045>

### REFERENCES

1. Liu Z, Zhang G, Li J, Liu J, Lv P. The tumor-suppressive microRNA-135b targets c-myc in osteosarcoma. *PLoS One*. 2014; 9:e102621. <https://doi.org/10.1371/journal.pone.0102621>. [PubMed]. Retraction in: *PLoS One*. 2023; 18:e0282982. <https://doi.org/10.1371/journal.pone.0282982>. [PubMed]
2. Geng S, Gu L, Ju F, Zhang H, Wang Y, Tang H, Bi Z, Yang C. MicroRNA-224 promotes the sensitivity of osteosarcoma cells to cisplatin by targeting Rac1. *J Cell Mol Med*. 2016; 20:1611–19. <https://doi.org/10.1111/jcmm.12852>. [PubMed]. Retraction in: *J Cell Mol Med*. 2019; 23:5832. <https://doi.org/10.1111/jcmm.14431>. [PubMed]
3. Wang P, Wang H, Li X, Liu Y, Zhao C, Zhu D. SRCIN1 Suppressed Osteosarcoma Cell Proliferation and Invasion. *PLoS One*. 2016; 11:e0155518. <https://doi.org/10.1371/journal.pone.0155518>. [PubMed]. Retraction in: *PLoS One*. 2023; 18:e0282984. <https://doi.org/10.1371/journal.pone.0282984>. [PubMed]
4. Shi X, Yan C, Liu B, Yang C, Nie X, Wang X, Zheng J, Wang Y, Zhu Y. miR-381 Regulates Neural Stem Cell Proliferation and Differentiation via Regulating Hes1 Expression. *PLoS One*. 2015; 10:e0138973. <https://doi.org/10.1371/journal.pone.0138973>. [PubMed]. Retraction in: *PLoS One*. 2023; 18:e0282981. <https://doi.org/10.1371/journal.pone.0282981>. [PubMed]
5. Yang D, Liu G, Wang K. miR-203 Acts as a Tumor Suppressor Gene in Osteosarcoma by Regulating RAB22A. *PLoS One*. 2015; 10:e0132225. <https://doi.org/10.1371/journal.pone.0132225>. [PubMed]. Retraction in: *PLoS One*. 2023; 18:e0282979. <https://doi.org/10.1371/journal.pone.0282979>. [PubMed]
6. Yu L, Gong X, Sun L, Zhou Q, Lu B, Zhu L. The Circular RNA Cdr1as Act as an Oncogene in Hepatocellular Carcinoma through Targeting miR-7 Expression. *PLoS One*. 2016; 11:e0158347. <https://doi.org/10.1371/journal.pone.0158347>. [PubMed]. Retraction in: *PLoS One*. 2023; 18:e0283112. <https://doi.org/10.1371/journal.pone.0283112>. [PubMed]

7. Sun L, Liang J, Wang Q, Li Z, Du Y, Xu X. MicroRNA-137 suppresses tongue squamous carcinoma cell proliferation, migration and invasion. *Cell Prolif.* 2016; 49:628–35. <https://doi.org/10.1111/cpr.12287>. [PubMed]
8. Tian S, Zhang M, Chen X, Liu Y, Lou G. MicroRNA-595 sensitizes ovarian cancer cells to cisplatin by targeting ABCB1. *Oncotarget.* 2016; 7:87091–99. <https://doi.org/10.18632/oncotarget.13526>. [PubMed]
